# Supplementary material for: Genome-wide association study-based prediction of atrial fibrillation using artificial intelligence
Source: PubMed Central journal article supplement (PMC8796259; doi:10.1136/openhrt-2021-001898), 2022-01-27
Supplement: openhrt-2021-001898supp001.pdf [file openhrt-2021-001898supp001.pdf]

1

**Supplementary Materials**

2

**3 Genome-wide association study-based prediction of atrial fibrillation using artificial  
4 intelligence**5 Oh-Seok Kwon, PhD<sup>a</sup>; Myunghee Hong, PhD<sup>a</sup>; Tae-Hoon Kim, MD<sup>a</sup>; Inseok Hwang<sup>a</sup>,6 Jaemin Shim, MD, PhD<sup>b</sup>; Eue-Keun Choi, MD, PhD<sup>c</sup>; Hong Euy Lim, MD, PhD<sup>d</sup>; Hee Tae7 Yu, MD, PhD<sup>a</sup>; Jae-Sun Uhm, MD, PhD<sup>a</sup>; Boyoung Joung, MD, PhD<sup>a</sup>; Seil Oh, MD, PhD<sup>c</sup>;8 Moon-Hyoung Lee, MD, PhD<sup>a</sup>; Young-Hoon Kim, MD, PhD<sup>b</sup>; Hui-Nam Pak, MD, PhD<sup>a</sup>.

9

10 <sup>a</sup>*Yonsei University Health System, Seoul, Republic of Korea*11 <sup>b</sup>*Korea University Cardiovascular Center, Seoul, Republic of Korea*12 <sup>c</sup>*Seoul National University, Seoul, Republic of Korea*13 <sup>d</sup>*Hallym University, Republic of Korea*

14

### 1 ***Study design and subjects***

2 We included 6,358 subjects from 4 independent cohorts and their GWAS data. The Korean  
3 AF Network is a consortium of four educational hospitals (Korea University Guro Hospital,  
4 Korea University Anam Hospital, Seoul National University Hospital, and Severance  
5 Hospital in the Yonsei University Health System) located in the Seoul area and concentrates  
6 on AF ablation related clinical studies. The Yonsei AF Ablation cohort and Korean AF  
7 Network were approved by the Institutional Review Board at each institution that participated  
8 in this study. Written informed consent was obtained from all patients.

9 As a control group, 5,486 samples were recruited from the health examinee (HEXA) cohort  
10 (n=3,700) and Korean Multi-Rural Communities Cohort Study (n=1,786, Figure 1). Both  
11 control cohorts are ongoing studies and a major part of the Korea Genome Epidemiology  
12 Study (KoGES) initiated in 2001. The HEXA cohort recruited from a large urban population  
13 and the Korean Multi-Rural Communities Cohort recruited volunteers older than 40 years of  
14 age living in a rural area. All subjects recruited were Korean, excluding all other ancestries.  
15 The informed consent requirement in the HEXA and Korean Multi-Rural Communities  
16 Cohort were waived.

17

### 18 ***Genotyping***

19 The genetic datasets were genotyped with an Array 6.0 chip and genotype calls were  
20 identified by using the Birdseed V2 algorithm. The quality control (QC)[1, 2] was performed  
21 to the following criteria: (1) deviation from the Hardy-Weinberg equilibrium with a  
22  $P < 1.0 \times 10^{-7}$ , (2) minor allele frequency (MAF)  $< 1\%$ , and (3) call rate  $< 95\%$ . We additionally  
23 excluded ambiguous variants including the indel variants. An imputation analysis was not

1 performed in order to prevent overfitting and to reduce any uncertainty. The inflation factor  $\lambda$   
2 was estimated to be 1.043 after merging all our cohorts (Supplementary Figure 1A). The final  
3 531,766 SNPs were used for model training and the association analyses (Supplementary  
4 Figure 1B).

5

### 6 ***Network model design***

7 CNN is an architecture for learning image data because that can filter spatial locality and  
8 capture the interactions between features using receptive fields.[3] Convolution operation,  
9 which plays an important role in CNN, performs feature extraction from images using  
10 optimizable parameters called kernel or filter. It has been widely applied in various fields, and  
11 it can adaptively learn spatial hierarchies of data features from low- to high-level patterns.  
12 The application of CNN was possible because SNP input data located in base pairs can be  
13 controlled with characteristics similar to images in that individual allele information is  
14 arranged on the same physical base pair.

15 The first convolutional layer used a  $3 \times 1$  convolutional kernel because of the one-dimensional  
16 genetic information encoded by the linear DNA strands. The pooling layer was not added for  
17 testing each SNP sequentially with the null hypothesis of no association. The number of  
18 convolution filters used in the convolution layer was calculated according to the input size as  
19 in the following equation (1):

$$\text{Conv } K = \max(n/8, 64), \quad (1)$$

20 where  $n$  is the number of input SNPs and is designed to have a maximum of 64 kernels. As  
21 implied in the above equation, the first layer was led to the  $k$ -kernel to extract patterns of  
22 various features from the  $(X_1, X_2, \dots, X_n)$  input. In consideration of the protective effects with

1 dying neurons due to rare variants, the activation function was adopted as a leaky rectified  
 2 linear unit (Leaky ReLU( $x$ ) =  $\max(0.1x, x)$ ). After the convolution layer, k-filtered patterns  
 3 derived from the convolution layer were connected to the fully connected layer (FC) for the  
 4 classification. Here, the FC activation function was applied with a rectified linear unit  
 5 (ReLU), and the number of neurons was obtained by the following equation (2):

$$FC \text{ neurons} = \max(n * K / 8, 1,024). \quad (2)$$

6 In the above equation, the FC layer is the determined maximum of 1,024 neurons by input  
 7 SNPs and the number of filters. Finally, because the output layer was a probability for the  
 8 phenotype, it was a probability from 0 to 1 by a sigmoid function. We implemented with  
 9 Python (ver. 3.5) and TensorFlow (ver. 1.14.0) backend. Since the number of input SNPs  
 10 differs depending on the  $P$ -value cutoff, the number of convolution filters and neurons of the  
 11 FC layer were identified with a manual search. Using the mean square error and log-loss  
 12 metrics, lightweight architecture was chosen unless a significant difference was found.

13

#### 14 ***CNN-GWAS model training***

15 The learning rate  $Lr$  began at  $10^{-3}$ , where the loss decreased by 0.99 times below 2 and by  
 16 0.999 times below 1, eventually converging to  $10^{-6}$  as the following equation (3):

$$Lr = \begin{cases} 10^{-3} & \text{initial state} \\ 0.99Lr & \text{if loss} < 2 \\ 0.999Lr & \text{if loss} < 1 \\ 10^{-6} & \text{convergence state} \end{cases} . \quad (3)$$

17 To avoid overfitting, the dropout rate was set to 10%, and early stopping was used to stop  
 18 learning. If the loss was not continuously improved to less than 1% for the three epochs,  
 19 learning was stopped. In addition, to add stability and improve the generalization, L1 and L2

1 regularization were both set to  $10^{-5}$ . The hyperparameters (learning rate, dropout rate, L1, and  
2 L2 regularization) were selected with grid search.

3 The GWAS data showed that the control group was relatively larger than the case group. If  
4 this balance of the GWAS data is not considered, models are likely to be biased and trained  
5 into the control group. Therefore, we applied a stratified K-fold cross-validation technique  
6 that maintained a case/control ratio of 1:1 and induced the effect of cross-validation at the  
7 same time. The folding K used in the experiment was randomly determined from 5 to 10 for  
8 each epoch.

9 The loss function applied a sigmoid cross-entropy loss function for the binary classification.  
10 To train our network, to achieve minimum log-loss, the network weights were optimized  
11 using an Adam optimizer. The applied cross-validation and validation set was used to select  
12 appropriate hyper-parameters and find the optimal model for classification.

13

#### 14 ***CNN-GWAS verification***

15 To verify our model, four validation processes were conducted. First, we repeated the  
16 training, validation, and test processes 5-times to demonstrate the reproducibility of the AF  
17 prediction and each sample was randomly constructed. Second, to examine whether SNPs of  
18 statistically non-significant  $P$ -values by a logistic regression did not really affect the AF  
19 prediction, a SNP list was constructed and verified based on a  $P \geq 0.99$ . Third, in order to  
20 identify that there was no predictive power for a phenotype without heritability (here are odd-  
21 even registration numbers) other than AF, the validity was verified by replacing the AF label  
22 with an odd-even registration number. We chose the odd-even registration numbers to  
23 account for the unexpected bias by the random labels. Fourth, the saliency score of each SNP

1 for AF prediction was analyzed in all AF patients (n=872) using a model of best-performance  
2 among the model (Figure 2E). A Grad-CAM was applied to calculate the contribution score  
3 of each SNP for the AF prediction of the individual. To visualize the overall significance of  
4 SNPs contributing to the prediction, the saliency score analysis procedure was constructed  
5 with the following steps: (1) The SNP information of AF patients encoded by the additive  
6 model was sorted in a physical base-pair order, (2) AF patients that failed classification were  
7 excluded from feature visualization, (3) the saliency map was derived from 5 different  
8 models pre-trained with different sample configurations, taking into account the bias in the  
9 training phase, (4) the important SNPs contributing to AF prediction were calculated as the  
10 average of the saliency map for each patient, (5) the final mean saliency score was  
11 normalized, and (6) The threshold for the highlight of important features was set at 5%. The  
12 Grad-CAM equation (4) is described below:

$$\text{Saliency score}_i^c = \sum_k w_k^c A_i^c, \quad (4)$$

13 where the *Saliency score*<sub>*i*</sub><sup>*c*</sup> is the vector represented contribution of each SNP for the AF  
14 prediction of an individual, *i* is the location of the feature map  $A^k$ , *c* is the class, and  $w_k^c$  is  
15 the backpropagation gradient of the convolution kernel *k*. The mean contribution score of AF  
16 predictions was calculated as the mean of each saliency score of the individual SNPs in the  
17 predicted AF patients. Fifth, to identify whether the issue by class imbalance affected the AF  
18 prediction, we conducted a propensity-score matching study.

19

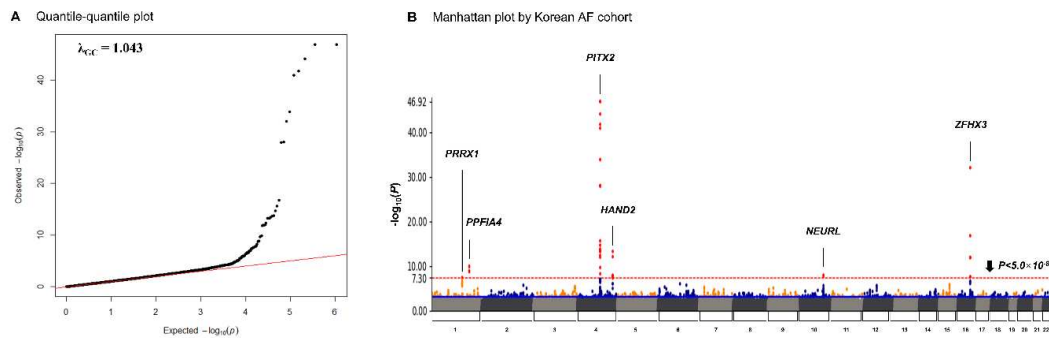

**Supplementary Figure 1.** Quantile-quantile plot and Manhattan plot by GWAS of Korean AF cohort.

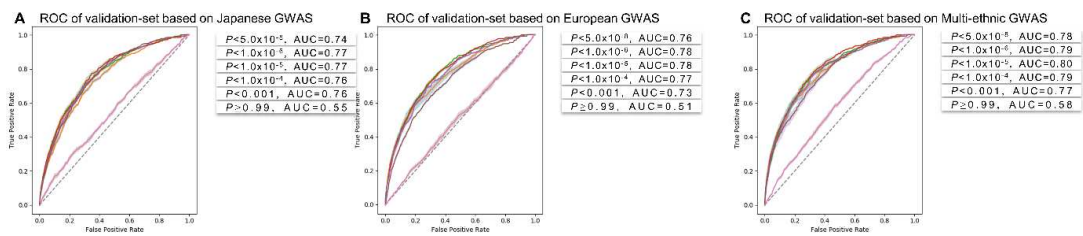

**Supplementary Figure 2.** Performance evaluation results for validation-set. (A-C) The results of the AF prediction at each  $P$ -value cutoff in each ethnic-specific validation set.

**Supplementary Table 1.** Baseline summary of previously reported ethnic-specific GWAS cohorts.

| Characteristics    | Japanese [4] | European [5] | Multi-ethnic [6] |                    |                  |                 |                 |                 |
|--------------------|--------------|--------------|------------------|--------------------|------------------|-----------------|-----------------|-----------------|
|                    |              |              | Total            | EUR                | ASN              | AA              | BRAZ            | HISP            |
| <b>Cases, N</b>    | 8,180        | 60,620       | 65,446           | 55,114<br>(84.2%)  | 8,180<br>(12.5%) | 1,307<br>(2.0%) | 568<br>(0.9%)   | 277<br>(0.4%)   |
| <b>Controls, N</b> | 28,612       | 970,216      | 539,544          | 499,095<br>(92.5%) | 28,612<br>(5.3%) | 7,660<br>(1.4%) | 1,096<br>(0.2%) | 3,081<br>(0.6%) |
| <b>Overall, N</b>  | 36,792       | 1,030,836    | 604,990          | 554,209<br>(91.6%) | 36,792<br>(6.1%) | 8,967<br>(1.5%) | 1,664<br>(0.3%) | 3,358<br>(0.6%) |

EUR, European; ASN, Asian; AA, African American; BRAZ, Brazilian; HISP, Hispanic.

**Supplementary Table 2.** The number of common SNPs by *P*-value cutoffs for each population type.

| <i>P</i> -value cutoff | Population type |              |                  |
|------------------------|-----------------|--------------|------------------|
|                        | Japanese [4]    | European [5] | Multi-ethnic [6] |
| < 0.001                | 2,211           | 5,401        | 4,732            |
| < 1.0×10 <sup>-4</sup> | 587             | 2,755        | 2,372            |
| < 1.0×10 <sup>-5</sup> | 262             | 1,704        | 1,540            |
| < 1.0×10 <sup>-6</sup> | 153             | 1,192        | 1,037            |
| < 5.0×10 <sup>-8</sup> | 91              | 814          | 723              |
| ≥ 0.990                | 4,221           | 4,699        | 4,965            |

SNPs, single nucleotide polymorphisms.

**Supplementary Table 3.** Predictive performance for each best model by the SNP set derived from ethnic-specific GWAS.

| Population type | <i>P</i> -value       | SNPs  | AUC   | Sens  | Spec  | PPV   | NPV   | Gini  | Log-loss | MSE   |
|-----------------|-----------------------|-------|-------|-------|-------|-------|-------|-------|----------|-------|
| Japanese        | <0.001                | 2,211 | 0.793 | 0.789 | 0.688 | 0.287 | 0.953 | 0.585 | 0.735    | 0.133 |
| European        | <1.0×10 <sup>-6</sup> | 1,192 | 0.808 | 0.743 | 0.745 | 0.317 | 0.948 | 0.615 | 0.701    | 0.106 |
| Multi-ethnic    | <1.0×10 <sup>-5</sup> | 1,540 | 0.836 | 0.760 | 0.762 | 0.338 | 0.952 | 0.672 | 0.564    | 0.084 |

SNPs, single nucleotide polymorphisms; AUC, area under the curve; Sens, sensitivity; Spec, specificity; PPV, positive predictive value; NPV, negative predictive value; Gini, gini coefficient; MSE, mean square error.



**Supplementary Table 4.** Prediction performance of the AF associated SNP sets for the odd-even registration numbers.

| Population type | P-value               | SNPs  | AUC       | Sens      | Spec      | PPV       | NPV       | Gini       | Log-loss  | MSE       |
|-----------------|-----------------------|-------|-----------|-----------|-----------|-----------|-----------|------------|-----------|-----------|
| Japanese        | <0.001                | 2,211 | 0.50±0.01 | 0.50±0.05 | 0.51±0.05 | 0.51±0.01 | 0.51±0.01 | -0.01±0.02 | 0.87±0.01 | 0.31±0.02 |
|                 | <1.0×10 <sup>-4</sup> | 587   | 0.51±0.01 | 0.53±0.04 | 0.51±0.02 | 0.52±0.01 | 0.52±0.02 | 0.03±0.03  | 0.75±0.01 | 0.26±0.01 |
|                 | <1.0×10 <sup>-5</sup> | 262   | 0.50±0.02 | 0.53±0.03 | 0.49±0.03 | 0.51±0.01 | 0.51±0.01 | 0.01±0.03  | 0.73±0.01 | 0.25±0.01 |
|                 | <1.0×10 <sup>-6</sup> | 153   | 0.51±0.01 | 0.55±0.02 | 0.49±0.03 | 0.52±0.01 | 0.52±0.01 | 0.02±0.02  | 0.71±0.01 | 0.26±0.01 |
|                 | <5.0×10 <sup>-8</sup> | 91    | 0.49±0.00 | 0.53±0.06 | 0.47±0.06 | 0.50±0.00 | 0.50±0.01 | -0.01±0.01 | 0.70±0.00 | 0.25±0.00 |
| European        | <0.001                | 5,401 | 0.50±0.01 | 0.49±0.04 | 0.52±0.04 | 0.51±0.01 | 0.50±0.01 | 0.00±0.02  | 0.99±0.05 | 0.27±0.04 |
|                 | <1.0×10 <sup>-4</sup> | 2,755 | 0.48±0.01 | 0.48±0.02 | 0.50±0.02 | 0.49±0.01 | 0.49±0.01 | -0.04±0.01 | 0.87±0.01 | 0.28±0.03 |
|                 | <1.0×10 <sup>-5</sup> | 1,704 | 0.48±0.01 | 0.49±0.07 | 0.50±0.08 | 0.50±0.01 | 0.49±0.01 | -0.04±0.03 | 0.84±0.01 | 0.28±0.02 |
|                 | <1.0×10 <sup>-6</sup> | 1,192 | 0.49±0.01 | 0.48±0.05 | 0.52±0.06 | 0.51±0.01 | 0.50±0.01 | -0.02±0.02 | 0.79±0.01 | 0.26±0.02 |
|                 | <5.0×10 <sup>-8</sup> | 814   | 0.50±0.01 | 0.53±0.05 | 0.47±0.03 | 0.50±0.01 | 0.50±0.01 | -0.01±0.02 | 0.76±0.01 | 0.26±0.01 |
| Multi-ethnic    | <0.001                | 4,732 | 0.49±0.01 | 0.52±0.06 | 0.49±0.07 | 0.5±0.02  | 0.50±0.02 | -0.02±0.03 | 2.61±1.05 | 0.46±0.26 |
|                 | <1.0×10 <sup>-4</sup> | 2,372 | 0.48±0.02 | 0.50±0.02 | 0.47±0.01 | 0.49±0.01 | 0.49±0.01 | -0.04±0.03 | 0.83±0.03 | 0.26±0.01 |
|                 | <1.0×10 <sup>-5</sup> | 1,540 | 0.49±0.01 | 0.45±0.01 | 0.56±0.01 | 0.51±0.00 | 0.50±0.00 | -0.02±0.02 | 0.84±0.05 | 0.28±0.01 |
|                 | <1.0×10 <sup>-6</sup> | 1,037 | 0.50±0.01 | 0.55±0.03 | 0.47±0.02 | 0.51±0.01 | 0.51±0.01 | 0.01±0.03  | 0.82±0.02 | 0.27±0.01 |
|                 | <5.0×10 <sup>-8</sup> | 723   | 0.49±0.01 | 0.49±0.04 | 0.51±0.05 | 0.50±0.01 | 0.50±0.01 | -0.02±0.02 | 0.87±0.02 | 0.28±0.00 |

Data are shown as the mean ± SD.

SNP, single nucleotide polymorphism; AUC, area under the curve; Sens, sensitivity; Spec, specificity; PPV, positive predictive value; NPV, negative predictive value; Gini, gini coefficient; MSE, mean square error.

**Supplementary Table 5.** Characteristics of case and control groups after 1:1 propensity-score matching.

| Baseline characteristics           | Case<br>(N = 862) | Control<br>(N = 862) | P-value |
|------------------------------------|-------------------|----------------------|---------|
| Age, year                          | 50.4 ± 7.9        | 51.1 ± 8.0           | 0.070   |
| Male sex, %                        | 695 (80.6)        | 694 (80.5)           | 0.951   |
| Body mass index, kg/m <sup>2</sup> | 25.0 ± 3.0        | 25.1 ± 3.0           | 0.908   |
| Hypertension, %                    | 299 (34.7)        | 268 (31.1)           | 0.112   |
| Diabetes, %                        | 65 (7.5)          | 69 (8.0)             | 0.719   |
| Coronary artery disease, %         | 76 (8.8)          | 64 (7.4)             | 0.290   |
| Stroke, %                          | 54 (6.2)          | 49 (5.7)             | 0.684   |

Data are shown as the mean ± SD or n (%);

**Supplementary Table 6.** The number of SNPs for PRS calculation in each GWAS.

| P-value cutoff*        | # of non-missing alleles used for scoring |          |              |
|------------------------|-------------------------------------------|----------|--------------|
|                        | Japanese                                  | European | Multi-ethnic |
| < 5.0×10 <sup>-8</sup> | 30                                        | 330      | 296          |
| < 1.0×10 <sup>-6</sup> | 62                                        | 482      | 414          |
| < 1.0×10 <sup>-5</sup> | 112                                       | 714      | 604          |
| < 1.0×10 <sup>-4</sup> | 318                                       | 1,218    | 1,020        |
| < 0.001                | 1,512                                     | 2,848    | 2,458        |
| ≥ 0.99                 | 376                                       | 504      | 480          |

\*  $r^2$  was set to 0.1 in all ethnicities.

### Supplementary References

- 1 Anderson CA, Pettersson FH, Clarke GM, et al. Data quality control in genetic case-control association studies. *Nat Protoc* 2010;**5**:1564-73.
- 2 Winkler TW, Day FR, Croteau-Chonka DC, et al. Quality control and conduct of genome-wide association meta-analyses. *Nat Protoc* 2014;**9**:1192-212.
- 3 Low SK, Takahashi A, Ebana Y, et al. Identification of six new genetic loci associated with atrial fibrillation in the Japanese population. *Nat Genet* 2017;**49**:953-8.
- 4 Nielsen JB, Thorolfsson RB, Fritsche LG, et al. Biobank-driven genomic discovery yields new insight into atrial fibrillation biology. *Nat Genet* 2018;**50**:1234-9.
- 5 Roselli C, Chaffin MD, Weng LC, et al. Multi-ethnic genome-wide association study for atrial fibrillation. *Nat Genet* 2018;**50**:1225-33.
